# Supplementary material for: Genomic and Metabolomic Characterization of Bacillus velezensis CMC-6 Reveals Biocontrol Potential Against Potato Fusarium Wilt
Source: Research Square preprint supplement (doi:10.21203/rs.3.rs-8286537/v1), 2026-01-27
Supplement: Supplementary file 1 [file 152f9765b4d70da2e8d4be27.docx]

**Supplementary Table**

**Supplementary Table 1** PCR reaction system

| System components | Reaction system |
| --- | --- |
| DNA template | 1 μL |
| ddH2O | 7.5 μL |
| 2×Taq PCR Mix | 12.5 μL |
| Forward primer(20 pmol/μL) | 1 μL |
| Reverse primer2(20 pmol/μL) | 1 μL |

**Supplementary Table 2** Indoor Disease Rating Standard for Potato Fusarium Wilt

| Disease level | Grading standard |
| --- | --- |
| 0 | Healthy plant, asymptomatic |
| 1 | 20 percent of leaves showed yellow, wilt, dying |
| 2 | 21～40 percent of leaves showed symptom |
| 3 | 41~60 percent of leaves showed symptom |
| 4 | 61~80 percent of leaves showed symptom |
| 5 | More than 80 percent of leaves showed symptom |

**Supplementary Table 3** Field management schedule and investigation timeline of potato Fusarium wilt trials at different experimental sites in Inner Mongolia

| Location | Seed treatment date | Planting date | Mid-season investigation date | Harvest date |
| --- | --- | --- | --- | --- |
| Wuchuan County, Hohhot City | April 28, 2024 | April 29, 2024 | June 15, 2024 | September 25, 2024 |
| Kalaqin Banner, Chifeng City | April 19, 2024 | April 20, 2024 | July 10, 2024 | September 21, 2024 |
| Chahar Right Front Banner, Ulanqab City | May 4, 2024 | May 5, 2024 | July 1, 2024 | October 3, 2024 |

Note: Field operations were conducted according to local agronomic practices, and all treatments were managed uniformly across sites.

**Supplementary Table 4** Field disease rating standard for potato Fusarium wilt

| Grade | Description |
| --- | --- |
| 0 | No visible symptoms; leaves remain green and healthy, and plant growth is normal. |
| 1 | Slight symptoms; less than 25% of leaves show wilting, yellowing, or chlorosis; partial leaf or stem necrosis may appear. |
| 2 | Moderate symptoms; 26-50% of leaves exhibit wilting or yellowing. |
| 3 | Severe symptoms; 51-75% of leaves are wilted and yellowed. |
| 4 | Very severe symptoms; more than 76% of leaves show advanced wilting and necrosis, and the plant is severely stunted or dead. |
